# Supplementary material for: Introducing ytterbium acetate to luminescent CsPbCl3 nanocrystals for enhanced sensitivity of Cu2+ detection
Source: Royal Society of Chemistry journal article supplement (doi:10.1039/d1qi01235e), 2021-11-03
Supplement: d1qi01235e1.pdf [file d1qi01235e1.pdf]

# **Introducing Ytterbium Acetate to Luminescent CsPbCl<sub>3</sub> Nanocrystals for Enhanced Sensitivity of Cu<sup>2+</sup> Detection**

Xiufeng Wu,<sup>a</sup> Songtao Hu,<sup>a</sup> He Shao,<sup>a</sup> Lifang Li,<sup>a</sup> Wenda Chen,<sup>a</sup> Biao Dong,<sup>a</sup> Lin Xu,<sup>a</sup> Wen Xu,<sup>a</sup> Donglei Zhou,<sup>a</sup> Zhennan Wu,<sup>\*a</sup> Hongwei Song,<sup>\*a</sup> and Xue Bai<sup>\*a</sup>

<sup>a</sup>State Key Laboratory of Integrated Optoelectronics, College of Electronic Science and Engineering, Jilin University, 2699 Qianjin Street, Changchun 130012, China.

\*E-mail: [wuzn@jlu.edu.cn](mailto:wuzn@jlu.edu.cn), [songhw@jlu.edu.cn](mailto:songhw@jlu.edu.cn), [baix@jlu.edu.cn](mailto:baix@jlu.edu.cn)

## 1. Experimental

### 1.1 Materials

Cs<sub>2</sub>CO<sub>3</sub> (99.9%), PbCl<sub>2</sub> (99.99%), Pb(OAc)<sub>2</sub> (99%), octadecene (ODE, 90%), oleylamine (OLA, 80-90%) and octylamine (OctAm, 99%) were purchased from Macklin, oleic acid (OA, 90%) and octanoic acid (OctAc, 98%) were purchased from Alfa Aesar. All other chemical reagents including YbCl<sub>3</sub> (99%), Yb(OAc)<sub>3</sub>·xH<sub>2</sub>O (99.99%), ZnCl<sub>2</sub> (99%), cycloethane (90%), sodium oleate (99%), KCl (99%), FeCl<sub>3</sub>·6H<sub>2</sub>O (99%), MgSO<sub>4</sub>·7H<sub>2</sub>O (99%), NiCl<sub>2</sub>·6H<sub>2</sub>O (98%), CaCl<sub>2</sub>·2H<sub>2</sub>O (99%), Mn(OAc)<sub>2</sub>·4H<sub>2</sub>O (99%), CuCl<sub>2</sub>·2H<sub>2</sub>O (99%), sodium oleate (90%), AgNO<sub>3</sub> (99.5%), Al(NO<sub>3</sub>)<sub>3</sub>·9H<sub>2</sub>O (99%), ErCl<sub>3</sub>·6H<sub>2</sub>O (99.9%), were purchased from Aladdin and used directly.

### 1.2 Synthesis of the Cs-oleate solution

0.4 g Cs<sub>2</sub>CO<sub>3</sub>, 1.2 mL OA, and 15 mL ODE were added into a 50 mL three-necked flask, then heated to 120 °C until the Cs source completely dissolved and the as-prepared solution sustained at 100 °C for subsequent experiments.

### 1.3 Synthesis of initial CsPbCl<sub>3</sub> NCs and series of CsPbCl<sub>3</sub> nanocrystals passivated by ytterbium acetate

**For the synthesis of the initial CsPbCl<sub>3</sub> NCs**, added PbCl<sub>2</sub> (0.056 g), OA (0.5 mL), OLA (0.8 mL), OctAc (0.5 mL), OctAm (0.5 mL) and ODE (5 mL) into a 50 ml 3-necked round-bottom flask under N<sub>2</sub> for 60 mins at 120 °C. Then, rapidly inject 0.7 mL of the prepared cesium oleate solution as the temperature increase to 140 °C. After 50 mins, cool the reaction mixture in an ice-water bath. The obtained product was separated by centrifugation for 10 mins at 9500 rpm, the precipitate was redispersed in 3 mL of cycloethane, centrifuged once again for 10 mins at 9500 rpm, and redispersed in 1 mL of cycloethane.

**For the synthesis of CsPbCl<sub>3</sub> nanocrystals passivated by ytterbium acetate**, diverse

amounts of  $\text{Yb}(\text{OAc})_3 \cdot x\text{H}_2\text{O}$  (0.03, 0.05 and 0.15 mmol) and  $\text{PbCl}_2$  were added to the three-necked bottle together. And the  $\text{CsPbCl}_3$  NWs were formed when the feeding amount is 0.05 mmol. The following steps are analogous to that during the synthesis of the initial  $\text{CsPbCl}_3$  NCs.

**For the synthesis of referenced samples R1 and R2**, the 0.075 mmol  $\text{Pb}(\text{OAc})_2 \cdot x\text{H}_2\text{O}$  and 0.05 mmol  $\text{YbCl}_3 \cdot 6\text{H}_2\text{O}$  were added into the reaction solution, respectively. The subsequent steps are similar to that in the production of the initial  $\text{CsPbCl}_3$  NCs. And the corresponding product is defined as R1 and R2 for clarification, respectively.

#### **1.4 Preparation of metal ions solution**

Take  $\text{Cu}^{2+}$  ion solution as an example. 0.1 mmol  $\text{CuCl}_2$  was dissolved by 0.5 mL  $\text{H}_2\text{O}$  to form a clear and transparent solution. Then put certain amounts of sodium oleate (molar ratio of Na : Cu, 2:1) into  $\text{H}_2\text{O}$ -ethanol mixture solution (ratio of volume, 1:1). The obtained copper oleate was centrifuged for 10 mins at 9500 rpm. The precipitate was dried overnight at 60 °C and dissolved in cyclohexane for storage. The other metal ions involved in this study were also prepared in the same way.

## **2. Characterizations**

### **2.1 Morphology and structure characterization.**

For the transmission electron microscopy (TEM), high-resolution TEM (HRTEM), and elemental mapping measurements, the samples were imaged by a Titan transmission electron microscope (FEI Company) worked at 300 kV in EFTEM mode with a 20 KeV energy. And the Powder XRD characterization was performed by a Rigaku D/Max-Ra X-ray diffractometer. The inductively coupled plasma mass-spectrometry (ICP-MS) was measured on a Varian 720-ES ICP-optical emission spectrometer. X-ray photoelectron spectroscopy (XPS) patterns were obtained through a Kratos Axis Ultra DLD spectrometer equipped with a monochromatic Al K  $\alpha$  X-ray source ( $h\nu = 1486.6$  eV) operated at 150 W. The infrared Fourier spectroscopy was measured by a Fourier

transform infrared (FT-IR) spectrometer from Japan with a mercury cadmium telluride detector. The AFM images were obtained by conducting a DI Innova AFM (Bruker) in light tapping mode.

## **2.2 Optical and electrical characterization**

**Optical studies.** The UV-vis absorption spectra were recorded by using a Shimadzu UV-3101PC UV-Vis scanning spectrophotometer in the range 300-900 nm. Photoluminescence spectra were recorded under ambient conditions by using an FLS365 spectrometer. The luminescence decay curves were acquired by an FLS920 spectrofluorometer. Absolute quantum yield was then calculated by using the Edinburgh L920 software package.

**Defect density and conductivity measurement.** The capacitor-like devices were fabricated by spinning. CsPbCl<sub>3</sub> perovskite active layers (20 mg mL<sup>-1</sup>) at 1000 rpm for 40 s and depositing Ag by thermal evaporation in a vacuum deposition chamber. And the current-voltage (*I-V*) curves of the devices under diverse bias were measured by a Keithley 2400 sourcemeter.

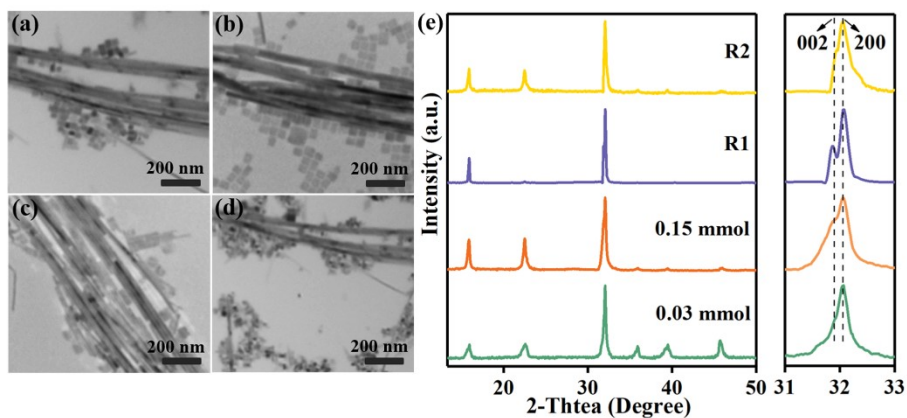

**Fig. S1.** TEM images of samples synthesized with adding different amounts of AcO<sup>-</sup> (a) 0.03 mmol, (b) 0.15 mmol, (c) R1 and (d) R2; (e) XRD patterns of 0.03 mmol, 0.15 mmol AcO<sup>-</sup> passivated CsPbCl<sub>3</sub> NCs, R1 and R2, with the selected zoom-in area centered at 31.8 and 32.1 degree.

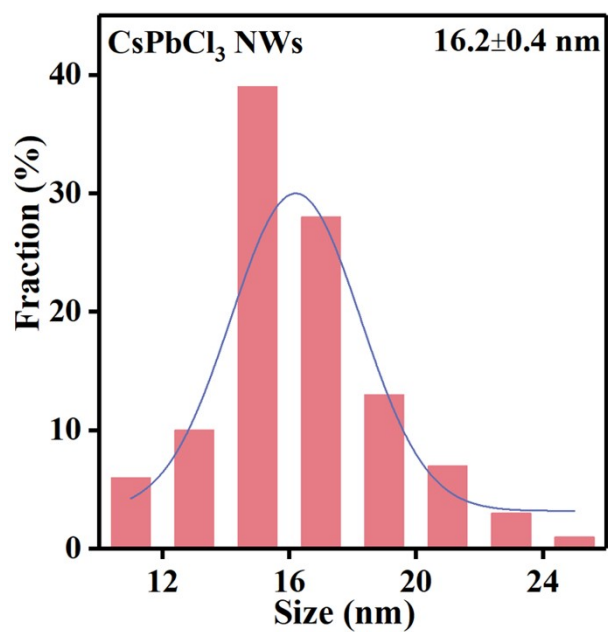

**Fig. S2.** Diameter size distribution of the final CsPbCl<sub>3</sub> NWs, calculated from TEM images.

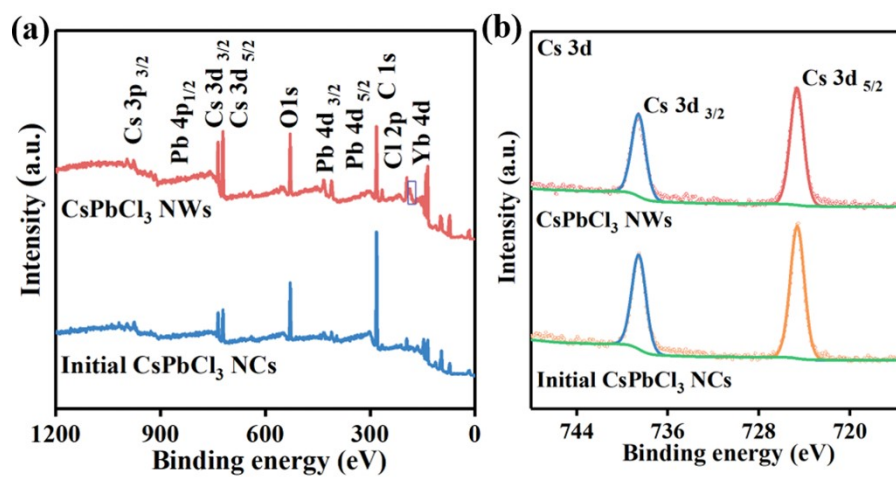

**Fig. S3.** High-resolution XPS analysis of initial CsPbCl<sub>3</sub> NCs and final CsPbCl<sub>3</sub> NWs corresponding to (a) survey spectra, (b) Cs 3d.

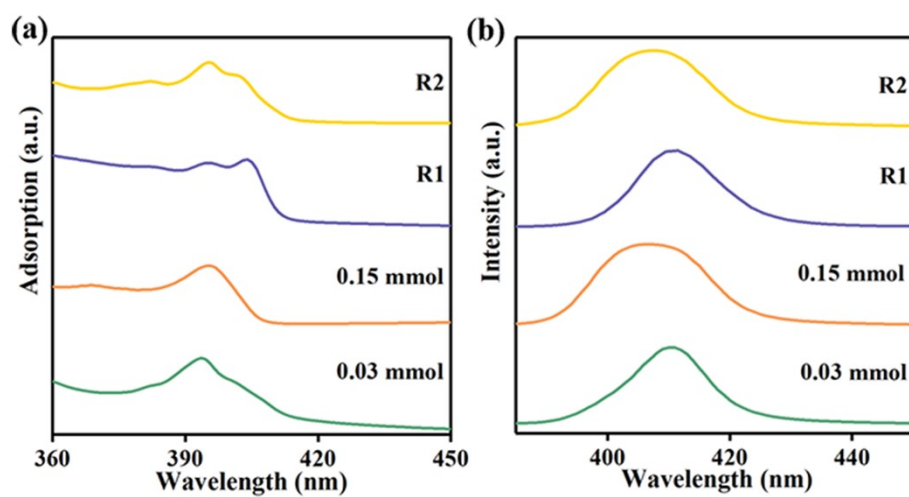

**Fig. S4** (a) Absorption, (b) PL emission spectra for 0.03 mmol, 0.15 mmol AcO<sup>-</sup> passivated CsPbCl<sub>3</sub> NCs and R1, R2.



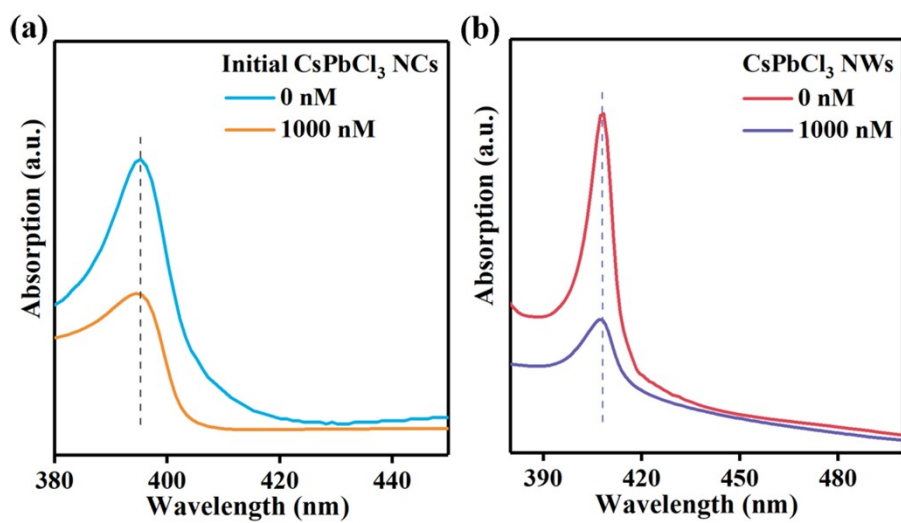

**Fig. S5.** (a) Absorption spectra of initial CsPbCl<sub>3</sub> NCs and (b) final CsPbCl<sub>3</sub> NWs after feeding certain concentration of Cu<sup>2+</sup> ions.

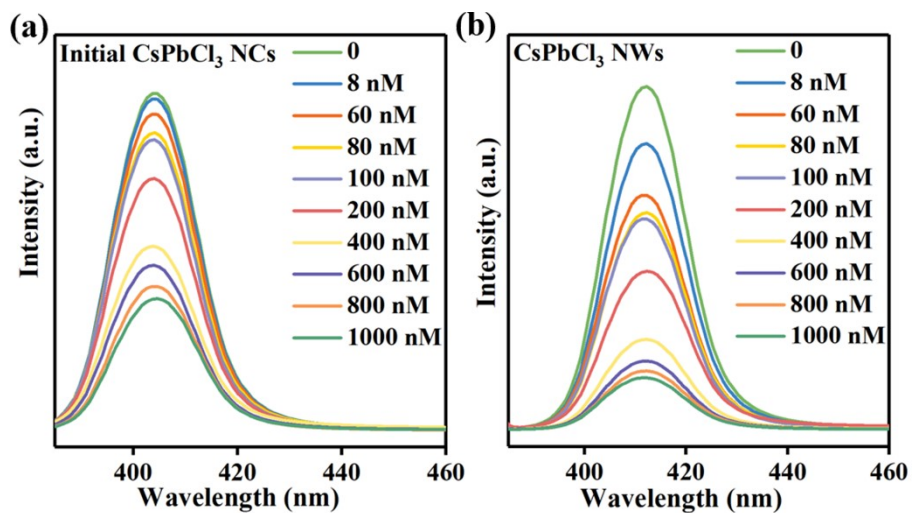

**Fig. S6** The PL dependence of (a) initial CsPbCl<sub>3</sub> NCs and (b) final CsPbCl<sub>3</sub> NWs on Cu<sup>2+</sup> concentration under 365 nm excitation.

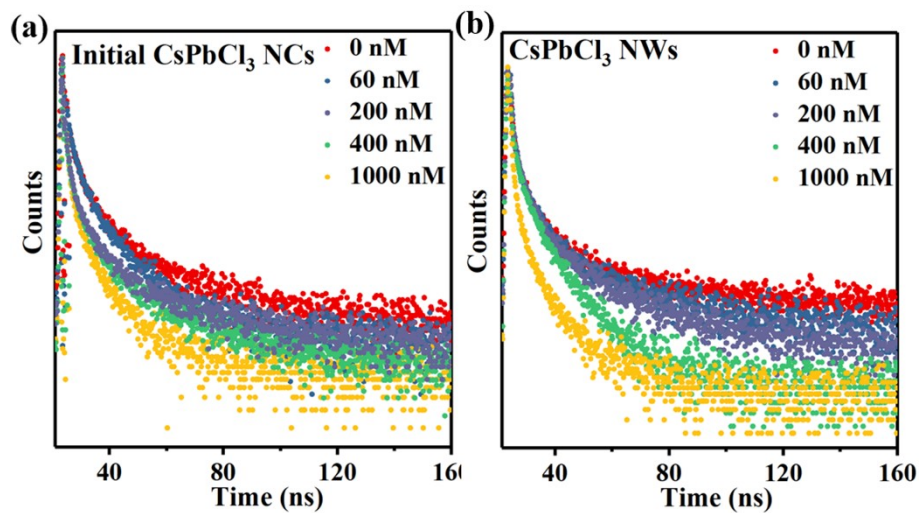

**Fig. S7** The PL decay curves of (a) initial CsPbCl<sub>3</sub> NCs and (b) final CsPbCl<sub>3</sub> NWs vs. the Cu<sup>2+</sup> concentration.

**Table S1.** ICP of mole ratio of Yb to Pb for the different amount of Yb(OAc)<sub>3</sub> passivated CsPbCl<sub>3</sub> NCs.

|                                                |   |      |      |      |
|------------------------------------------------|---|------|------|------|
| Yb(OAc) <sub>3</sub> feeding amounts<br>(mmol) | 0 | 0.03 | 0.05 | 0.15 |
| (ICP) mole ratio of Yb to<br>(Yb+Pb) (%)       | 0 | 0.40 | 1.8  | 3.7  |

**Table S2.** Resistance, thickness and conductivity of the films deposited from initial CsPbCl<sub>3</sub> NCs and final CsPbCl<sub>3</sub> NWs. The resistances are determined from the slope of the *I-V* curves shown in Fig. 4b in the main text; thicknesses are obtained by AFM,

measurements and the conductivities are calculated from the formula:  $\sigma = \frac{d}{AR}$

|                                    | Resistance<br>( $\Omega$ ) | Thickness<br>(nm) | Conductivity<br>(S/cm) |
|------------------------------------|----------------------------|-------------------|------------------------|
| initial CsPbCl <sub>3</sub><br>NCs | 217.4                      | 142               | $1.6 \times 10^{-3}$   |
| CsPbCl <sub>3</sub> NWs            | 26.0                       | 165               | $15.8 \times 10^{-3}$  |

**Table 3.** Summary of perovskite-based fluorescent probes for Cu<sup>2+</sup> in organic phase.

| Probes                     | Solvent     | Detection limit (nM) | Linear detection range                     | Ref       |
|----------------------------|-------------|----------------------|--------------------------------------------|-----------|
| CsPbCl <sub>3</sub><br>QDs | cyclohexane | 20 nM                | 2×10 <sup>-8</sup> to 2×10 <sup>-5</sup> M | 1         |
| CsPbBr <sub>3</sub><br>QDs | hexane      | 0.1 nM               | 0 to 1×10 <sup>-7</sup> M                  | 2         |
| CsPbCl <sub>3</sub><br>NWs | cyclohexane | 0.06 nM              | 0 to 1000 nM                               | This work |

**Table S4.** The PL decay time of the initial CsPbCl<sub>3</sub> NCs after adding different amount of the Cu<sup>2+</sup>.

|         | $\tau_1$ (ns) | $a_1$ | $\tau_2$ (ns) | $a_2$ | $\tau_{\text{avg}}$ (ns) |
|---------|---------------|-------|---------------|-------|--------------------------|
| 0 nM    | 1.22          | 0.47  | 10.23         | 0.53  | 9.37                     |
| 60 nM   | 1.18          | 0.52  | 9.92          | 0.48  | 8.93                     |
| 200 nM  | 1.12          | 0.47  | 9.40          | 0.53  | 8.61                     |
| 400 nM  | 1.07          | 0.48  | 9.28          | 0.52  | 8.49                     |
| 1000 nM | 1.03          | 0.49  | 9.21          | 0.51  | 8.42                     |

**Table S5.** The PL decay time of the final CsPbCl<sub>3</sub> NWs after adding different amount of the Cu<sup>2+</sup>.

|         | $\tau_1$ (ns) | $a_1$ | $\tau_2$ (ns) | $a_2$ | $\tau_{\text{avg}}$ (ns) |
|---------|---------------|-------|---------------|-------|--------------------------|
| 0 nM    | 1.32          | 0.51  | 13.61         | 0.49  | 12.48                    |
| 60 nM   | 1.21          | 0.52  | 12.52         | 0.48  | 11.41                    |
| 200 nM  | 1.15          | 0.47  | 11.40         | 0.53  | 10.56                    |
| 400 nM  | 1.04          | 0.45  | 9.13          | 0.55  | 8.43                     |
| 1000 nM | 0.89          | 0.66  | 8.35          | 0.34  | 7.48                     |



**Table S6.** The PL decay time of the initial CsPbCl<sub>3</sub> NCs and final CsPbCl<sub>3</sub> NWs after adding the Cu<sup>2+</sup>.

|                          | Initial CsPbCl <sub>3</sub><br>NCs | Initial CsPbCl <sub>3</sub><br>NCs<br>(1000 nM) | CsPbCl <sub>3</sub> NWs | CsPbCl <sub>3</sub> NWs<br>(1000 nM) |
|--------------------------|------------------------------------|-------------------------------------------------|-------------------------|--------------------------------------|
| $\tau_1$ (ns)            | 1.22                               | 1.03                                            | 1.32                    | 0.89                                 |
| $a_1$                    | 0.47                               | 0.49                                            | 0.51                    | 0.66                                 |
| $\tau_2$ (ns)            | 10.23                              | 9.21                                            | 13.61                   | 8.35                                 |
| $a_2$                    | 0.53                               | 0.51                                            | 0.49                    | 0.34                                 |
| $\tau_{\text{avg}}$ (ns) | 9.37                               | 8.42                                            | 12.48                   | 7.48                                 |

## Reference

- 1 X. Sheng, Y. Liu, Y. Wang, Y. Li, X. Wang, X. Wang, Z. Dai, J. Bao and X. Xu, Cesium lead halide perovskite quantum dots as a photoluminescence probe for metal ions, *Adv. Mater.*, 2017, **29**, 1700150.
- 2 Y. Liu, X. Tang, T. o Zhu, M. Deng, I. P. Ikechukwu, W. Huang, G. Yin, Y. Bai, D. Qu, X. Huang and F. Qiu, All-inorganic CsPbBr<sub>3</sub> perovskite quantum dots as a photoluminescent probe for ultrasensitive Cu<sup>2+</sup> detection, *J. Mater. Chem. C*, 2018, **6**, 4793-4799.
